# Supplementary material for: TrypOx, a Novel Eukaryotic Homolog of the Redox-Regulated Chaperone Hsp33 in Trypanosoma brucei
Source: PubMed Central journal article supplement (PMC7423844; doi:10.3389/fmicb.2020.01844), 2020-08-06
Supplement: Image_2.pdf [file Image_2.pdf]

**Figure S2**

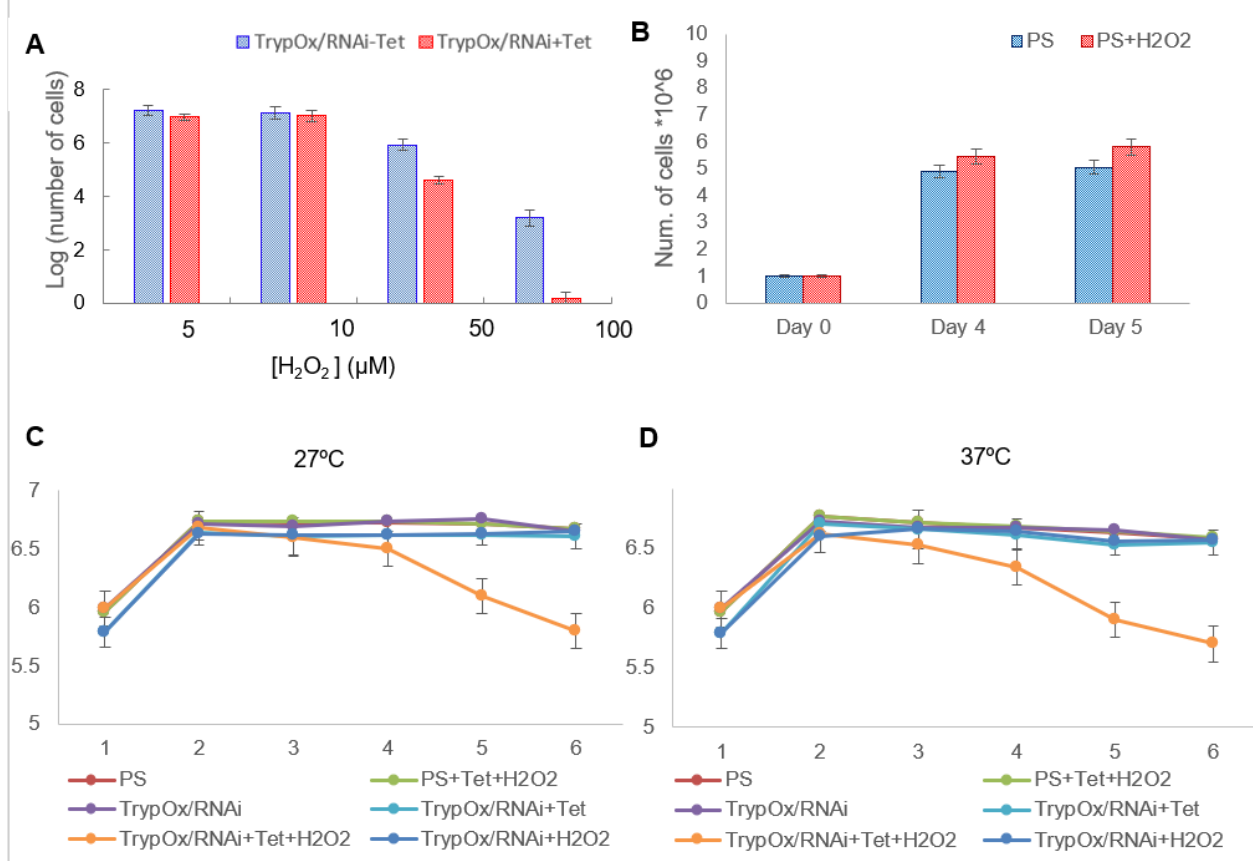

**Figure S2. Oxidation-dependent growth of the TrypOx RNAi strain.** (A) Survival of induced (red) and non-induced (blue) cells expressing TrypOx RNAi in the absence of varying H<sub>2</sub>O<sub>2</sub> concentrations. (B) Survival of the PS cells in the presence (red) and absence (blue) of 50μM H<sub>2</sub>O<sub>2</sub> over the course of 5 days. (C-D) The sensitivity of parental and TrypOx RNAi strains to 50 μM H<sub>2</sub>O<sub>2</sub> at (C) 27°C and (D) 37°C. Tetracycline induction did not alter the growth in both strains. Growth of the parental strain was not affected by the supplement of peroxide in the absence and presence of tetracycline.
