# Supplementary material for: TrypOx, a Novel Eukaryotic Homolog of the Redox-Regulated Chaperone Hsp33 in Trypanosoma brucei
Source: PubMed Central journal article supplement (PMC7423844; doi:10.3389/fmicb.2020.01844), 2020-08-06
Supplement: Image_3.pdf [file Image_3.pdf]

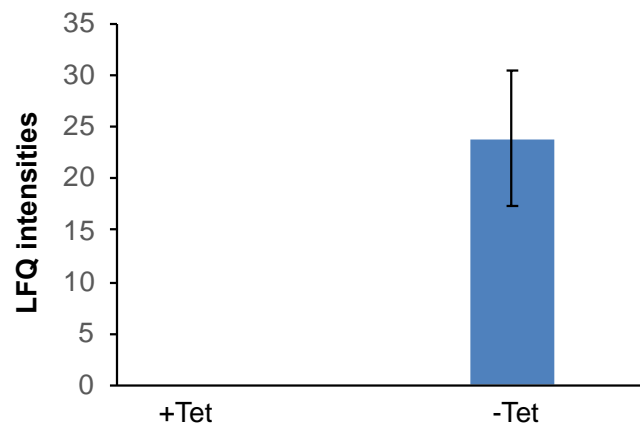

**Figure S3. Silencing of TrypOx transcript resulted in no protein synthesis.** TrypOx protein intensities TrypOx/RNAi strains in absence (uninduced) and presence (induced) tetracycline. Protein identification and intensities were measured using LC-MS/MS in three biological replicates.
