# Supplementary material for: TrypOx, a Novel Eukaryotic Homolog of the Redox-Regulated Chaperone Hsp33 in Trypanosoma brucei
Source: PubMed Central journal article supplement (PMC7423844; doi:10.3389/fmicb.2020.01844), 2020-08-06
Supplement: Table_1.pdf [file Table_1.pdf]

**Table S1. Protein homologues with an additional non-Hsp33 domain**

| <b>Taxonomy</b>              | <b>Additional domain</b>         | <b>GI (NCBI) number</b> |
|------------------------------|----------------------------------|-------------------------|
| Mycoplasma ovipneumoniae     | competence-damaged protein, CinA | 498006943               |
| Mycoplasma flocculare        | competence-damaged protein, CinA | 488621072               |
| Mycoplasma dispar            | competence-damaged protein, CinA | 765307823               |
| Mycoplasma conjunctivae      | competence-damaged protein, CinA | 502285817               |
| Mycoplasma hyorhinitis       | competence-damaged protein, CinA | 503067451               |
| Mycoplasma hypopneumoniae    | competence-damaged protein, CinA | 499519431               |
| Phytophthora palmivora       | BTB like domain (DUF3342 domain) | 1338257754              |
| Phytophthora cactorum        | BTB like domain (DUF3342 domain) | 1418029886              |
| Phytophthora kernoviae       | BTB like domain (DUF3342 domain) | 1492271495              |
| Nothophytophthora            | BTB like domain (DUF3342 domain) | 1492297074              |
| Achlya hypogyna              | Kinesin-associated protein (KAS) | 1173942638              |
| Thraustotheca clavata        | Kinesin-associated protein (KAS) | 1173948825              |
| Aphanomyces astaci           | Kinesin-associated protein (KAS) | 1475206491              |
| Thermus thermophilus         | Zn ribbon domain                 | 499486343               |
| Thermus aquaticus            | Zn ribbon domain                 | 489135825               |
| Oceanithermus profundus      | Zn ribbon domain                 | 503223216               |
| Thermus scotoductus          | Zn ribbon domain                 | 505921673               |
| Marinithermus hydrothermalis | Zn ribbon domain                 | 503469464               |
| Thermus sp. CCB_US3_UF1      | Zn ribbon domain                 | 504328475               |
| Thermus oshimai              | Zn ribbon domain                 | 511099563               |
| Thermus islandicus           | Zn ribbon domain                 | 551067784               |
| Thermus antranikianii        | Zn ribbon domain                 | 655044257               |
| Thermus tengchongensis       | Zn ribbon domain                 | 740200430               |
| Thermus amyloliquefaciens    | Zn ribbon domain                 | 740215007               |
| Thermus filiformis           | Zn ribbon domain                 | 740219580               |
| Thermus parvatiensis         | Zn ribbon domain                 | 982900045               |
| Thermus arciformis           | Zn ribbon domain                 | 1224991293              |
| Thermus brockianus           | Zn ribbon domain                 | 1103715456              |
| Thermus tenuipunicus         | Zn ribbon domain                 | 1357954445              |
| Meiothermus                  | Zn ribbon domain                 | 1402629770              |
| Thermus caldifontis          | Zn ribbon domain                 | 1434566446              |
| Thermus sediminis            | Zn ribbon domain                 | 1468270746              |
| Thermus tengchongensis       | Zn ribbon domain                 | 1608627423              |
| Thermus caldilimi            | Zn ribbon domain                 | 1608621924              |
