# Supplementary material for: TrypOx, a Novel Eukaryotic Homolog of the Redox-Regulated Chaperone Hsp33 in Trypanosoma brucei
Source: PubMed Central journal article supplement (PMC7423844; doi:10.3389/fmicb.2020.01844), 2020-08-06
Supplement: Table_4.pdf [file Table_4.pdf]

**Table S4-A.** Strains used in this study

| Strain                                       | Genotype                      | Plasmid                                                                        | Comment                                 |
|----------------------------------------------|-------------------------------|--------------------------------------------------------------------------------|-----------------------------------------|
| BL21- <i>E.coli Hsp33</i>                    | $\Delta$ <i>hslo</i> ,        | Pet11a containing the <i>hslo</i> gene, <i>Amp</i> resistance                  | Expression of <i>E.coli Hsp33</i>       |
| BL21- <i>E.coli -TrypOx</i>                  | $\Delta$ <i>hslo</i> ,        | Pet11a containing the chimeric <i>Hsp33-TrypOx</i> gene, <i>Amp</i> resistance | Expression of HHsp33sp33-TrypOx protein |
| <i>T.brucei</i> Trypox RNAi <i>T. brucei</i> | <i>T. brucei</i> strain 29-13 | pZJM vector with the anti-trypOx fragment                                      | Silencing of TrypOx                     |

**Table S4-B.** Sequences of primers and proteins used in this study

| Name                          | Sequence                                                                                                                                                                                                                                                                                                                                               |
|-------------------------------|--------------------------------------------------------------------------------------------------------------------------------------------------------------------------------------------------------------------------------------------------------------------------------------------------------------------------------------------------------|
| Tb 927.6.2630 Sense           | 5'-GGGTCTAGACTTTGACGCAGCTCATAGAC-3'                                                                                                                                                                                                                                                                                                                    |
| Tb 927.6.2630 antisense       | 5'-AAAACGCGTAACGCTAAATATTTTCAGGTT-3'                                                                                                                                                                                                                                                                                                                   |
| BL21- <i>E.coli -WT Hsp33</i> | MGSSHHHHHHSSGLVPRGSHMIMPQHDQLHRYLFENFAV<br>RGELVTVSETLQQILENHDYPQPVKNVLAELLVATSLLTAT<br>LKFDGDITVQLQGDGPMNLA VINGNNNQQMRGVARVQGE<br>IPENADLKT LVGNGYVVITITPSEGERYQGVVGLGDTLAA<br>CLEDYFMRSEQLPTRLFIRTDVDGKPAAGGMLLQVMPAQ<br>NAQQDDFDHLATLTETIKTEELLTLPANEVLWRLYHEEEVT<br>VYDPQDVEFKCTCSRERCADALKTLPDEEVDSILAEDGEID<br>MHCDYCGNHYLFNAMDIAEIRNNASPADPQVH |
| BL21- <i>E.coli -TrypOx</i>   | MIMPQHDQLHRYLFENFAVRGELVTVSETLQQILENHDYP<br>QPVKNVLAELLVATSLLTATLKFDGDITVQLQGDGPMNLA<br>VINGNNNQQMRGVARVQGEIPENADLKT LVGNGYVVITIT<br>PSEGERYQGVVGLGDTLAACLEDYFMRSEQLPTRLFIRTD<br>VDGKPAAGGMLLQVMPAQNAQQDDFDHLATLTETIKTE<br>ELLTLPANEVLWRLYHEEEVTVYDPQDVEFKCRCSKNNFL<br>RALVALPEEQLSSLMEETSFRCTFCAKEHVLQPEDWSKLLR<br>DRTSFKK                            |
